# Supplementary material for: Describing team development within a novel GP-led urgent care centre model: a qualitative study
Source: PubMed Central journal article supplement — BMJ Open. 2016 Jun 23;6(6):e010224. doi: 10.1136/bmjopen-2015-010224 (PMC4932257; doi:10.1136/bmjopen-2015-010224), 2016-06-23
Supplement: bmjopen-2015-010224supp_appendix2.pdf [file bmjopen-2015-010224supp_appendix2.pdf]

## Appendix 2 – Interview Protocol

- Can you please tell me a bit about your role in the UCC?
- Can you please tell me a bit about the patients who come to the UCC? Why do they come here?
- How do you feel/relate about these motives?
- In your perception, to what extent are patients satisfied with the service they get here?
- Can you please describe a usual day in the UCC? What's happening?
- Can you please tell me a bit about your communication with the patients who come here?
- Can you give me some examples of things that helped the model to achieve its goals, and some examples of things hindered the model from achieving its goals?
- Can you please tell me a bit about how working here is related to your professional development as a clinician?
- Can you please tell me a bit about how is it for you to work in the team?
- Can you please tell me a bit about how is it for you to work with the UCC team?
- Can you please tell me a bit about how you think that the community GPs feel about the UCC?
- Do you think the model should be embedded in other hospitals? Is there something that you would change or do differently in the future?
